# Supplementary material
Source: ML conference proceedings conference paper supplement (https://proceedings.mlr.press/v108/merigot20a.html)
Supplement: Supplementary file [file merigot20a-supp.pdf]

## SUPPLEMENTARY MATERIAL

### Proof of Proposition 2.1

If we denote  $\gamma := (T_\mu, T_\nu)_{\#}\rho$ , then  $\gamma \in \Pi(\mu, \nu)$ . The change of variable formula gives

$$\begin{aligned} W_2^2(\mu, \nu) &\leq \int_{\mathcal{Y} \times \mathcal{Y}} \|y - y'\|_2^2 d\gamma(y, y') \\ &= \int_{\mathcal{X}} \|T_\mu(x) - T_\nu(x)\|_2^2 \rho(x) dx = \|T_\mu - T_\nu\|_{L^2(\rho)}^2. \end{aligned}$$

The continuity of the map  $\mu \mapsto T_\mu$  follows from e.g. Exercise 2.17 in (Villani, 2003). To prove (iii), we use the following lemma:

**Lemma 5.1.** *Let  $\rho$  be uniform on the unit disc  $\mathcal{X} \subseteq \mathbb{R}^2$ . Then, there is a curve  $\theta \in [0, 2\pi] \rightarrow \mu_\theta \in \mathcal{P}(\mathcal{X})$  and  $C > 0$  such that  $\|T_{\mu_\theta} - T_{\mu_0}\|_{L^2(\rho)} \geq CW_2(\mu_\theta, \mu_0)^{1/2}$ .*

*Proof.* Given  $\theta \in \mathbb{R}$ , we denote  $x_\theta = (\cos \theta, \sin(\theta))$  and  $\mu_\theta = \frac{1}{2}(\delta_{x_\theta} + \delta_{-x_\theta})$ . Then, the optimal transport map between  $\rho$  and  $\mu_\theta$  is given by

$$T_{\mu_\theta}(x) = \begin{cases} x_\theta & \text{if } \langle x | x_\theta \rangle \geq 0 \\ -x_\theta & \text{if not.} \end{cases}$$

One can easily check that for  $\theta$  one has  $W_2(\mu_0, \mu_\theta) \leq \frac{|\theta|}{\sqrt{\pi}}$ . For  $\theta > 0$  we set

$$D_\theta = \{x \in \mathbb{R}^2 \mid \langle x | x_0 \rangle \geq 0 \text{ and } \langle x | x_\theta \rangle \leq 0\}.$$

Then, on  $D_\theta$ ,  $T_{\mu_\theta} \equiv x_{-\theta}$  and  $T_{\mu_0} \equiv x_0$ , giving

$$\|T_{\mu_\theta} - T_{\mu_0}\|_{L^2(\rho)}^2 \geq \int_{D_\theta} \|x_{-\theta} - x_0\|^2 dx = |D_\theta| \|x_{-\theta} - x_0\|^2.$$

Moreover, if  $|\theta| \leq \frac{\pi}{2}$  one has  $\|x_{-\theta} - x_0\|^2 \geq 2$ , thus giving  $\|T_{\mu_\theta} - T_{\mu_0}\|_{L^2(\rho)}^2 \geq 2|D_\theta| \geq \frac{|\theta|}{\pi}$ .  $\square$

### Proof of Theorem 2.2

The proof of Theorem 2.2 is based on the following lemma.

**Lemma 5.2.** *Under the assumptions of Theorem 2.2,*

$$\|T_\mu - T_\nu\|_{L^2(\rho)}^2 \leq 2K \int_{\mathcal{Y}} (\psi_\nu - \psi_\mu) d(\mu - \nu).$$

*Proof.* From convex analysis, the map  $T_\mu = \nabla \phi_\mu$  is  $K$ -Lipschitz if and only if  $\psi_\mu = \phi_\mu^*$  is  $\frac{1}{K}$ -strongly convex. We denote  $A = \int_{\mathcal{Y}} \psi_\nu d(\mu - \nu)$  and  $B = \int_{\mathcal{Y}} \psi_\mu d(\nu - \mu)$ .

We use that  $(\nabla \phi_\mu)_{\#}\rho = \mu$  (resp.  $(\nabla \phi_\nu)_{\#}\rho = \nu$ ) and  $\nabla \phi_\mu = \nabla \psi_\mu^*$  (resp.  $\nabla \phi_\nu = \nabla \psi_\nu^*$ ) by convexity of  $\phi_\mu$  (resp.  $\phi_\nu$ ) to do the following change of variable:

$$A = \int_{\mathcal{X}} (\psi_\nu(\nabla \psi_\mu^*) - \psi_\nu(\nabla \psi_\nu^*)) d\rho.$$

We now use the inequality  $\psi_\nu(y) - \psi_\nu(z) \geq \langle y - z | v \rangle$ , which holds for all  $v$  in the subdifferential  $\partial \psi_\nu(z)$ . The convex functions  $\psi_\nu, \psi_\mu$  are differentiable  $\rho$ -almost everywhere. Taking  $z = \nabla \psi_\nu^*(x)$  and  $y = \nabla \psi_\mu^*(x)$ , and using  $x \in \partial \psi_\nu(z)$ , we obtain

$$A \geq \int_{\mathcal{X}} \langle \text{id}, \nabla \psi_\mu^* - \nabla \psi_\nu^* \rangle d\rho.$$

Using the strong convexity of  $\psi_\mu$ , we get a similar lower bound on  $B$ , with an extra quadratic term

$$\begin{aligned} B &= \int_{\mathcal{X}} (\psi_\mu(\nabla\psi_\nu^*) - \psi_\mu(\nabla\psi_\mu^*)) d\rho \\ &\geq \int_{\mathcal{X}} (\langle \text{id}, \nabla\psi_\nu^* - \nabla\psi_\mu^* \rangle + \frac{1}{2K} \|\nabla\psi_\nu^* - \nabla\psi_\mu^*\|_2^2) d\rho. \end{aligned}$$

Summing up these inequalities we get:

$$\begin{aligned} \int_{\mathcal{Y}} (\psi_\nu - \psi_\mu) d(\mu - \nu) &\geq \frac{1}{2K} \int_{\mathcal{X}} \|\nabla\psi_\nu^* - \nabla\psi_\mu^*\|_2^2 d\rho \\ &= \frac{1}{2K} \|T_\nu - T_\mu\|_{L^2(\rho)}^2. \end{aligned} \quad \square$$

*Proof of Theorem 2.2.* Formula (3) clearly shows that  $\text{Lip}(\psi_\mu) \leq M_{\mathcal{X}}$ , where  $\text{Lip}(f)$  denotes the Lipschitz constant of  $f$ . Combining this with Lemma 5.2,

$$\begin{aligned} \|T_\mu - T_\nu\|_{L^2(\rho)}^2 &\leq 2K \int_{\mathcal{Y}} (\psi_\nu - \psi_\mu) d(\mu - \nu) \\ &\leq 2K \max_{\text{Lip}(f) \leq 2M_{\mathcal{X}}} \int_{\mathcal{Y}} f d(\mu - \nu) \\ &= 4KM_{\mathcal{X}} \max_{\text{Lip}(f) \leq 1} \int_{\mathcal{Y}} f d(\mu - \nu) \\ &= 4KM_{\mathcal{X}} W_1(\mu, \nu), \end{aligned}$$

where we used Kantorovich-Rubinstein's theorem to get the last equality. □

#### Proof of Corollary 2.4

We first state a simple lemma that links the uniform norm of a Lipschitz function to its  $L^2(\rho)$  norm:

**Lemma 5.3.** *If  $f$  is  $L$ -Lipschitz on  $\mathcal{X}$ , then*

$$\|f\|_\infty \leq C \|f\|_{L^2(\mathcal{X})}^{\frac{2}{d+2}},$$

for some  $C$  depending on  $L$ ,  $d$  and  $\mathcal{X}$  only.

*Proof.* If  $\|f\|_\infty = \eta$ , then there exists  $x_0 \in \mathcal{X}$  such that for all  $x \in B(x_0, \frac{\eta}{2L}) \cap \mathcal{X}$  we have  $|f(x)| \geq \frac{\eta}{2}$ . This implies that

$$\|f\|_{L^2(\mathcal{X})}^2 \geq \int_{B(x_0, \frac{\eta}{2L}) \cap \mathcal{X}} f(x)^2 dy \geq \beta_d \left(\frac{\eta}{2L}\right)^d \eta^2 = \frac{\beta_d}{(2L)^d} \|f\|_\infty^{d+2},$$

where  $\beta_d$  is the volume of the  $d$ -dimensional unit ball. □

*Proof of Corollary 2.4.* Theorem 2.3 implies

$$\|\nabla\psi_\mu - \nabla\psi_\nu\|_{L^2(\mathcal{Y})}^2 \leq C \left( \int_{\mathcal{Y}} (\psi_\nu - \psi_\mu) d(\mu - \nu) \right)^{\frac{1}{2d-1}},$$

and as in Theorem 2.2, the quantity in the parenthesis can be upper bounded by  $2M_{\mathcal{X}} W_1(\mu, \nu)$ . Adding a constant to  $\psi_\mu$  if necessary, we can assume that  $\int_{\mathcal{Y}} \psi_\mu(y) dy = \int_{\mathcal{Y}} \psi_\nu(y) dy$ . The Poincaré-Wirtinger inequality on  $\mathcal{Y}$  then implies

$$\|\psi_\mu - \psi_\nu\|_{L^2(\mathcal{Y})}^2 \leq C' W_1(\mu, \nu)^{\frac{1}{2d-1}},$$

for some  $C'$  depending only on  $\rho$ ,  $\mathcal{X}$  and  $\mathcal{Y}$ .

We reuse the fact that  $\psi_\mu - \psi_\nu$  is Lipschitz with a constant at most  $2M_{\mathcal{X}}$  to use Lemma 5.3:

$$\|\psi_\mu - \psi_\nu\|_\infty \leq C'' W_1(\mu, \nu)^{\frac{2}{2d-1(d+2)}}.$$

Since  $\phi_\mu = \psi_\mu^*$  and  $\phi_\nu = \psi_\nu^*$ , the definition of the Legendre transform yields

$$\|\phi_\mu - \phi_\nu\|_\infty \leq C'' W_1(\mu, \nu)^{\frac{2}{2^{d-1}(d+2)}}.$$

We conclude using Proposition 3.6 and the fact that  $\phi_\mu$  is  $\text{diam}(\mathcal{Y})$ -Lipschitz (as the Legendre transform of the function  $\psi_\mu$  on  $\mathcal{Y}$ ): there exists a constant  $C$  depending only on  $\rho$ ,  $\mathcal{X}$  and  $\mathcal{Y}$  such that

$$\|T_\mu - T_\nu\|_{L^2(\rho)} \leq C W_1(\mu, \nu)^{\frac{1}{2^{(d-1)(d+2)}}}. \quad \square$$

### Proof of Lemma 3.2

For any  $N > 0$ , we consider a finite partition  $\mathcal{Y} = \sqcup_{1 \leq i \leq N} \mathcal{Y}_i^N$ , we let  $\varepsilon_N = \max_i \text{diam}(\mathcal{Y}_i^N)$  and we assume that  $\lim_{N \rightarrow +\infty} \varepsilon_N = 0$ . Then, we define

$$\mu_N^k = \sum_{1 \leq i \leq N} \left[ \left(1 - \frac{1}{N}\right) \mu^k(\mathcal{Y}_i^N) + \frac{1}{N^2} \right] \delta_{y_i^N},$$

where  $y_i^N \in \mathcal{Y}_i^N$ . Then, it is easy to check that the support of the measures  $\mu_N^0$  and  $\mu_N^1$  is the set  $\{y_1^N, \dots, y_N^N\}$ . Moreover,

$$\|\mu_N^1 - \mu_N^0\|_{\text{TV}} \leq \|\mu^1 - \mu^0\|_{\text{TV}}.$$

In addition,  $W_1(\mu_N^k, \mu^k) \leq \varepsilon_N \xrightarrow{N \rightarrow +\infty} 0$ . Combined with the triangle inequality, we deduce

$$\begin{aligned} |W_1(\mu_N^0, \mu_N^1) - W_1(\mu^0, \mu^1)| &= |W_1(\mu_N^0, \mu_N^1) - W_1(\mu_N^0, \mu^1) + W_1(\mu_N^0, \mu^1) - W_1(\mu^0, \mu^1)| \\ &\leq |W_1(\mu_N^0, \mu_N^1) - W_1(\mu_N^0, \mu^1)| + |W_1(\mu_N^0, \mu^1) - W_1(\mu^0, \mu^1)| \\ &\leq W_1(\mu_N^1, \mu^1) + W_1(\mu_N^0, \mu^0) \\ &\leq 2\varepsilon_N \xrightarrow{N \rightarrow +\infty} W_1(\mu^0, \mu^1). \end{aligned}$$

Using the stability of optimal transport maps (Proposition 2.1), we finally deduce that

$$\lim_{N \rightarrow +\infty} \|T_{\mu_N^1} - T_{\mu_N^0}\|_{L^2(\rho)} = \|T_{\mu^1} - T_{\mu^0}\|_{L^2(\rho)}.$$

### Proof of Lemma 3.3

Let  $x^0 \in V_i(\psi^0)$  and  $x^1 \in V_i(\psi^1)$ . Then, for all  $j \in \{1, \dots, N\}$ ,

$$\begin{cases} \psi^0(y_j) \geq \psi^0(y_i) + \langle y_j - y_i | x^0 \rangle \\ \psi^1(y_j) \geq \psi^1(y_i) + \langle y_j - y_i | x^1 \rangle \end{cases}.$$

Taking the convex combination of these inequalities we get for all  $j \in \{1, \dots, N\}$ ,

$$\psi^t(y_j) \geq \psi^t(y_i) + \langle y_j - y_i | (1-t)x^0 + tx^1 \rangle.$$

This shows that  $(1-t)x^0 + tx^1 \in V_i(\psi^t)$  (note that we use the convexity of  $\mathcal{X}$  here). Thus,

$$(1-t)V_i(\psi^0) + tV_i(\psi^1) \subseteq V_i(\psi^t).$$

Taking the Lebesgue measure on both sides and applying Brunn-Minkowski's inequality we get

$$\begin{aligned} G_i(\psi^t)^{1/d} &= \rho(V_i(\psi^t))^{1/d} \geq \rho((1-t)V_i(\psi^0) + tV_i(\psi^1))^{1/d} \\ &\geq (1-t)\rho(V_i(\psi^0))^{1/d} + t\rho(V_i(\psi^1))^{1/d} \\ &\geq (1-t)G_i(\psi^0)^{1/d} + tG_i(\psi^1)^{1/d}. \end{aligned}$$

This inequality directly implies

$$G_i(\psi^t) \geq \min(G_i(\psi^0), G_i(\psi^1)),$$

$$\text{i.e. } \min(G_i(\psi^t), G_i(\psi^0)) \geq \min(G_i(\psi^0), G_i(\psi^1)).$$

Using the following equivalent formulation of the TV distance between probability measures we get (8):

$$\begin{aligned} \frac{1}{2} \|G(\psi^t) - G(\psi^0)\|_1 &= 1 - \sum_i \min(G_i(\psi^t), G_i(\psi^0)) \\ &\leq 1 - \sum_i \min(G_i(\psi^0), G_i(\psi^1)) = \frac{1}{2} \|G(\psi^t) - G(\psi^0)\|_1. \end{aligned}$$

To prove (9), we first remark that by (7),

$$\begin{aligned} G_i(\psi^t) &\geq (1-t)^d G_i(\psi^0), \\ \text{i.e. } \min(G_i(\psi^t), G_i(\psi^0)) &\geq (1-t)^d G_i(\psi^0). \end{aligned}$$

We conclude using the same formula as above:

$$\begin{aligned} \frac{1}{2} \|G(\psi^t) - G(\psi^0)\|_1 &= 1 - \sum_i \min(G_i(\psi^t), G_i(\psi^0)) \\ &\leq 1 - \sum_i (1-t)^d G_i(\psi^0) = 1 - (1-t)^d. \end{aligned}$$

### Proof of Proposition 3.4

This proof is a straightforward adaptation of Lemma 3.7 in (Eymard et al., 2000), but we include it for completeness. We consider the function  $u$  on  $\mathcal{X}$  defined a.e. by  $u|_{V_i(\psi)} = v_i$ . Then,

$$\langle v^2 - \langle v|G(\psi) \rangle^2 |G(\psi) \rangle = \int_{\mathcal{X}} u^2 - \left( \int_{\mathcal{X}} u \right)^2 = \frac{1}{2} \int_{\mathcal{X} \times \mathcal{X}} (u(x) - u(y))^2 dy dx,$$

so it suffices to control the right hand side of this equality. Given  $(i, j)$  and  $(x, y) \in \mathcal{X}^2$ , we denote

$$\chi_{ij}(x, y) = \begin{cases} 1 & \text{if } V_i(\psi) \cap V_j(\psi) \cap [x, y] \neq \emptyset \text{ and } \langle y_j - y_i | y - x \rangle \geq 0 \\ 0 & \text{if not.} \end{cases}$$

Then,  $u(y) - u(x) = \sum_{i \neq j} (v(y_j) - v(y_i)) \chi_{ij}(x, y)$ . Denoting  $d_{ij} = \|y_j - y_i\|$ ,  $c_{ij,z} = \left\langle \frac{z}{\|z\|} \middle| \frac{y_j - y_i}{\|y_j - y_i\|} \right\rangle$  and applying Cauchy-Schwarz's inequality we get

$$\begin{aligned} (u(y) - u(x))^2 &= \left( \sum_{i \neq j} (v(y_j) - v(y_i)) \chi_{ij}(x, y) \right)^2 \\ &\leq \sum_{i \neq j} \frac{(v(y_j) - v(y_i))^2}{d_{ij} c_{ij, y-x}} \chi_{ij}(x, y) \sum_{i \neq j} d_{ij} c_{ij, y-x} \chi_{ij}(x, y). \end{aligned}$$

In addition, when  $\chi_{ij}(x, y) = 1$ , we have  $\langle y - x | y_j - y_i \rangle \geq 0$  so that

$$d_{ij} c_{ij, y-x} = \|y_j - y_i\| \left\langle \frac{y - x}{\|y - x\|} \middle| \frac{y_j - y_i}{\|y_j - y_i\|} \right\rangle \geq 0,$$

and

$$\sum_{i \neq j} d_{ij} c_{ij, y-x} \chi_{ij}(x, y) = \sum_{i \neq j} \left\langle \frac{y - x}{\|y - x\|} \middle| y_j - y_i \right\rangle \chi_{ij}(x, y) \leq \text{diam}(\mathcal{Y}).$$

Therefore,

$$\begin{aligned} \int_{\mathcal{X} \times \mathcal{X}} (u(y) - u(x))^2 dx dy &\leq \text{diam}(\mathcal{Y}) \int_{\mathcal{X} \times \mathcal{X}} \sum_{i \neq j} \frac{(v(y_j) - v(y_i))^2}{d_{ij} c_{ij, y-x}} \chi_{ij}(x, y) dx dy \\ &= \text{diam}(\mathcal{Y}) \int_{B(0, \text{diam}(\mathcal{X}))} \sum_{i \neq j} \frac{(v(y_j) - v(y_i))^2}{d_{ij} c_{ij, z}} \left( \int_{\mathcal{X}} \chi_{ij}(x, x+z) dx \right) dz. \end{aligned}$$

Moreover, denoting  $m_{ij} = \mathcal{H}^{d-1}(V_i(\psi) \cap V_j(\psi))$  we get

$$\int_{\mathcal{X}} \chi_{ij}(x, x+z) dx \leq m_{ij} \|z\| c_{ij,z},$$

thus giving

$$\int_{\mathcal{X} \times \mathcal{X}} (u(y) - u(x))^2 dx dy \leq C(d) \text{diam}(\mathcal{Y}) \text{diam}(\mathcal{X})^{d+1} \sum_{i \neq j} \frac{m_{ij}}{d_{ij}} (v(y_j) - v(y_i))^2.$$

Define  $H_{ij} = \frac{m_{ij}}{d_{ij}}$ ,  $H_{ii} = -\sum_{j \neq i} H_{ij}$ . Then,  $DG(\psi) = H$ , and

$$\begin{aligned} \langle DG(\psi)v|v \rangle &= \sum_{i,j} H_{ij} v_i v_j \\ &= \sum_i \left( H_{ii} v_i v_i + \sum_{j \neq i} H_{ij} v_i v_j \right) \\ &= \sum_i \sum_{j \neq i} H_{ij} v_i (v_j - v_i) \\ &= \sum_{j \neq i} H_{ij} v_i (v_j - v_i) := A. \end{aligned}$$

And

$$\sum_{i \neq j} H_{ij} (v(y_j) - v(y_i))^2 = \sum_{i \neq j} H_{ij} v_j (v_j - v_i) - \sum_{i \neq j} H_{ij} v_i (v_j - v_i) = -2A.$$

We finally obtain

$$\iint (u(y) - u(x))^2 dx dy \leq -C_{d,\mathcal{X},\mathcal{Y}} \langle DG(\psi)v|v \rangle.$$
